# Supplementary material
Source: PubMed Central journal article supplement (PMC10529810)
Supplement: NIHMS1915697-supplement-1.pdf [file NIHMS1915697-supplement-1.pdf]

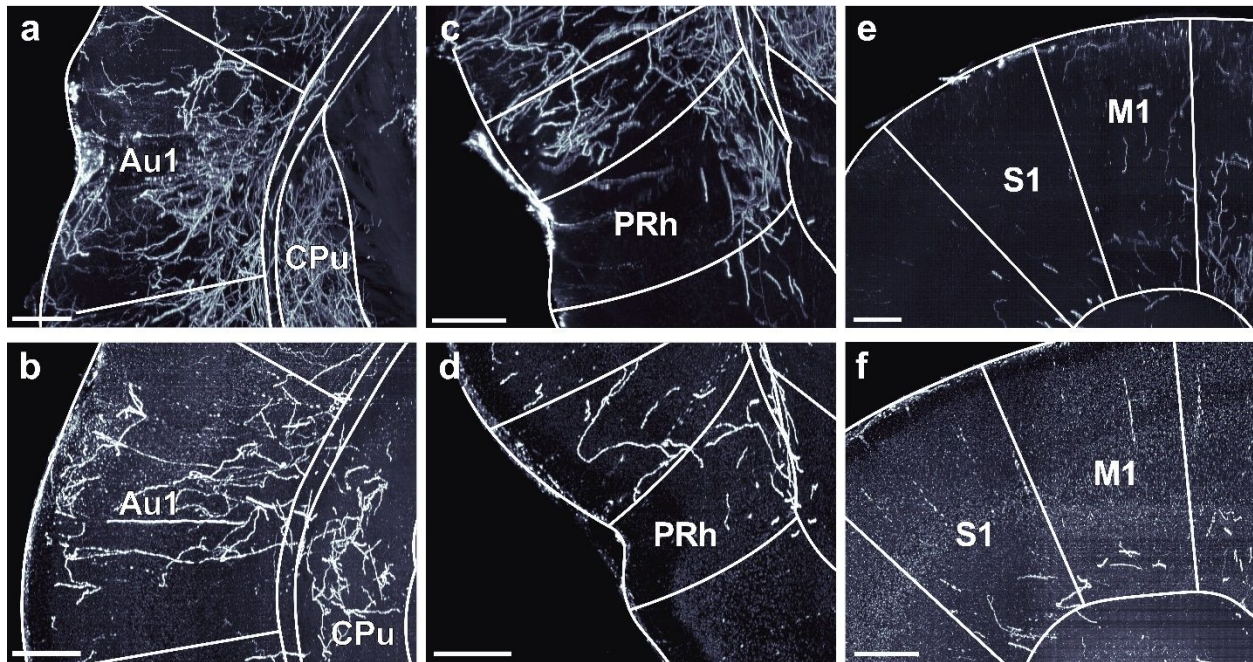

**Figure S1. Examples of strong (+++) moderate (++) and weak (+) collateral axon labeling. Scale bars = 500  $\mu$ m. A.** Strong (+++) labeling in Au1 and CPu of SUBJ-ID-143. **B.** Strong (+++) labeling in Au1 and CPu of SUBJ-ID-144. **C.** Moderate (++) labeling in PRh of SUBJ-ID-143. **D.** Moderate (++) labeling in PRh of SUBJ-ID-144. **E.** Weak (+) labeling in S1 and M1 in SUBJ-ID-143. **F.** Weak (+) labeling in S1 and M1 in SUBJ-ID-144.
